# Supplementary material for: Kinetically controlled way to create highly uniform mono-dispersed ZnO sub-microrods for electronics
Source: Royal Society of Chemistry journal article supplement (doi:10.1039/c2jm34050j), 2012-01-01
Supplement: c2jm34050j.pdf [file c2jm34050j.pdf]

## Electronic Supplementary Information

### Kinetically Controlled Way to Create Highly Uniform Mono- dispersed ZnO Sub-microrods for Electronics

*Woo Soon Jang\*\*†, Tea Il Lee\*\*†, Jin Young Oh†, Sung Hwan Hwang†, Sung Woo Shon†,  
Do Hyang Kim†, Younan Xia†,††, Jea Min Myoung\*†, and Hong Koo Baik\*†*

†Department of Materials Science and Engineering, Yonsei University, Seoul, Korea

††Department of Biomedical Engineering, Georgia Institute of Technology, Atlanta, USA

**Figure S1.**

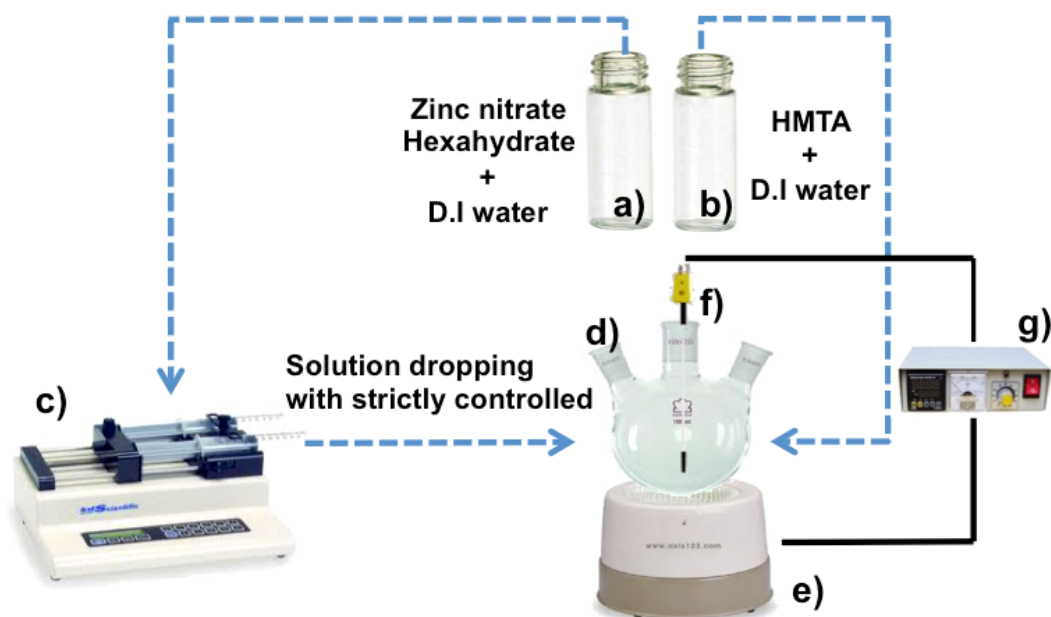

**Figure S1.** Schematic diagram for the kinetically controlled ZnO sub-microrods synthesis system. a ) zinc nitrate solution, b ) hexamethylenetetramine (HMTA) solution, c ) dual-syringe pump, d ) three-necks ground flask, e ) heating-mantle, f ) thermocouple, g ) thermal controller.

**Figure S2.**

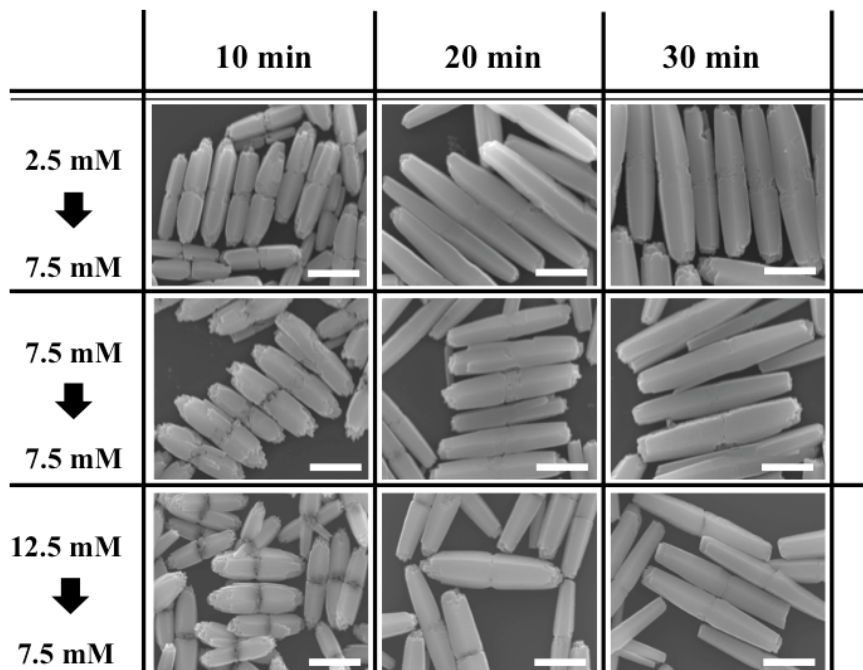

**Figure S2.** The influence of the concentration of initially supplied  $\text{Zn}^{2+}$  ions on the synthesis of ZnO sub-microrods. (scale bar =  $1\mu\text{m}$ )

**Figure S3.**

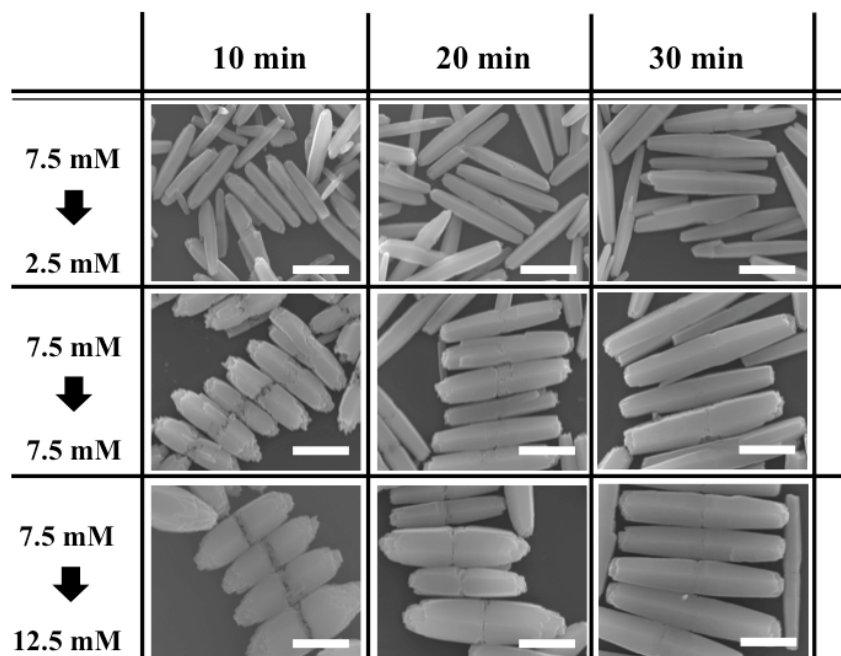

**Figure S3.** The influence of the concentration of additional solution supplied  $Zn^{2+}$  ions on the synthesis of ZnO sub-microrods. (scale bar =  $1\mu m$ )

**Figure S4.**

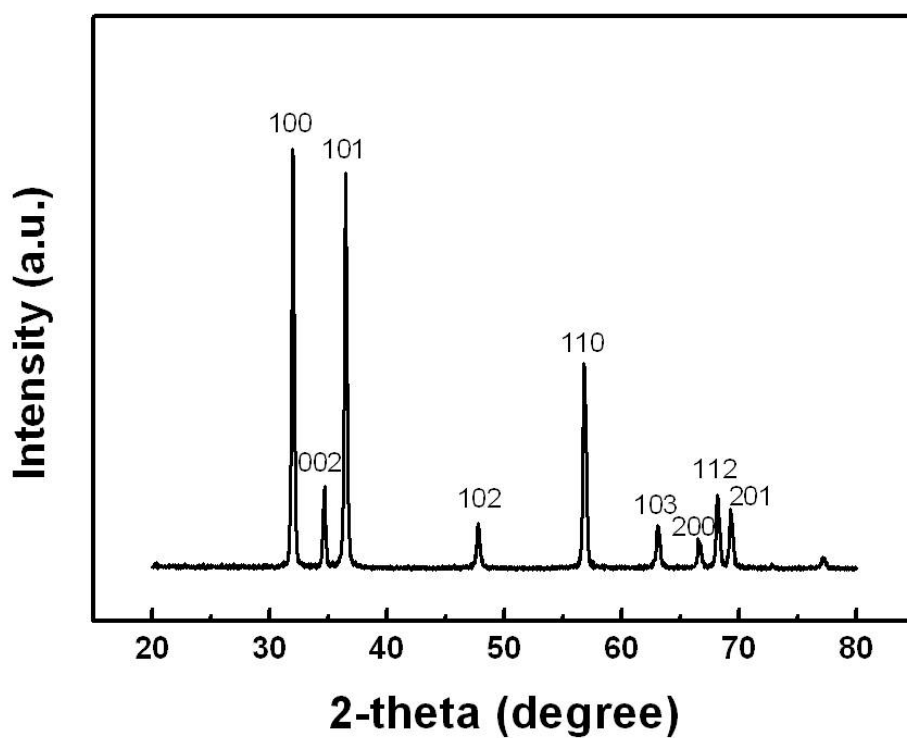

**Figure S4.** XRD pattern of ZnO sub-microrods. (growth time: 10s, seed: 7.5mM and growth 7.5mM conditions)

**Table S1.** The summarization of the average length and diameter of ZnO sub-microrods shown in Figure S3.

| Parameter                 | Unit ( $\mu\text{m}$ ) | 10 min | 20 min | 30 min |
|---------------------------|------------------------|--------|--------|--------|
| 7.5 $\rightarrow$ 2.5 mM  | Length                 | 1.33   | 1.81   | 2.37   |
|                           | Diameter               | 0.29   | 0.31   | 0.37   |
| 7.5 $\rightarrow$ 7.5 mM  | Length                 | 1.86   | 2.35   | 3.05   |
|                           | Diameter               | 0.46   | 0.49   | 0.52   |
| 7.5 $\rightarrow$ 12.5 mM | Length                 | 1.76   | 2.34   | 3.09   |
|                           | Diameter               | 0.53   | 0.57   | 0.61   |
